# Supplementary material
Source: MDPI journal article supplement (https://www.mdpi.com/2072-4292/5/1/284)
Supplement: s1 [file s1]

(listing pending)
