# Supplementary material
Source: MDPI journal article supplement (https://www.mdpi.com/2072-4292/5/1/284)
Supplement: s1 [file s1]

**OPEN ACCESS**

Remote Sensing

**ISSN 2072-4292**

www.mdpi.com/journal/remotesensing

Supplementary Information

Allometric Scaling and Resource Limitations Model of Tree Heights: Part 1. Model Optimization and Testing over Continental USA. *Remote Sens*. 2013, *5*, 284–306

Yuli Shi 1,2,†, Sungho Choi 2,†,*, Xiliang Ni 2,3, Sangram Ganguly 4, Gong Zhang 5, Hieu V. Duong 6, Michael A. Lefsky 6, Marc Simard 7, Sassan S. Saatchi 7, Shihyan Lee 8, Wenge Ni-Meister 8, Shilong Piao 9, Chunxiang Cao 3, Ramakrishna R. Nemani 10 and Ranga B. Myneni 2

1 School of Remote Sensing, Nanjing University of Information Science and Technology, Nanjing 210044, China; E-Mail: ylshi.nuist@gmail.com

2 Department of Earth and Environment, Boston University, 675 Commonwealth Avenue, Boston, MA 02215, USA; E-Mail: ranga.myneni@gmail.com

3 State Key Laboratory of Remote Sensing Sciences, Institute of Remote Sensing Applications, Chinese Academy of Sciences, Beijing 100101, China; E-Mails: nixl@irsa.ac.cn (X.N.); cao413@irsa.ac.cn (C.C.)

4 Bay Area Environmental Research Institute (BAERI)/NASA Ames Research Center, Moffett Field, CA 94035, USA; E-Mail: sangramganguly@gmail.com

5 Department of Watershed Science, Utah State University, Logan, UT 84322, USA;
E-Mail: gongzhang07@gmail.com

6 Center for Ecological Analysis of Lidar, Natural Resource Ecology Laboratory, Colorado State University, Fort Collins, CO 80523, USA; E-Mails: dr.hieu.duong@gmail.com (H.D.); lefsky@cnr.colostate.edu (M.L.)

7 Jet Propulsion Laboratory, California Institute of Technology, 4800 Oak Grove Dr., Pasadena, CA 91109, USA;
E-Mails: marc.simard@jpl.nasa.gov (M.S.); saatchi@jpl.nasa.gov (S.S.)

8 Department of Geography, Hunter College of CUNY, New York, NY 10065, USA;
E-Mails: shihyanlee@yahoo.com (S.L.); Wenge.Ni-Meister@hunter.cuny.edu (W.N.)

9 College of Urban and Environmental Sciences and Sino-French Institute for Earth System Science, Peking University, Beijing 100871, China; E-Mail: slpiao@pku.edu.cn

10 Biospheric Science Branch, NASA Ames Research Center, Moffett Field, CA 94035, USA;
E-Mail: rama.nemani@nasa.gov

**†** These authors contributed equally to this work.

***** Author to whom correspondence should be addressed; E-Mail: schoi@bu.edu;
Tel.: +1-617-353-8846; Fax: +1-617-353-8846.

List of Abbreviations

ASRL Allometric Scaling and Resource Limitations

DEM Digital Elevation Model

GLA14 GLAS Level-2 Land Surface Altimetry

GLAS [Geoscience Laser Altimeter System](http://glas.gsfc.nasa.gov/)

ICESat Ice, Cloud, and land Elevation Satellite

IDW Inverse Distance Weighting

LAI Leaf Area Index

LVIS Laser Vegetation Imaging Sensor

MODIS Moderate Resolution Imaging Spectroradiometer

NARR [North American Regional Reanalysis](http://www.emc.ncep.noaa.gov/mmb/rreanl/)

NDVI Normalized Vegetation Difference Vegetation Index

NED National Elevation Dataset

NLCD National Land Cover Database

RMSE Root Mean Square Error

TSF Temporal Spatial Filter

VCF Vegetation Continuous Fields

WMO World Meteorology Organization

# S1. Data

## *S1.1. Annual Average Relative Humidity*

Annual average temperature and annual average vapor pressure from DAYMET data were converted to annual average relative humidity (Φ) using a formula provided by World Meteorological Organization (WMO) [1] (Equation (S1)).

|  | (S1) |
| --- | --- |

Here *ew* is vapor pressure (hPa), ew* is statured vapor pressure (hPa) and *T* is air temperature (°C).

## *S1.2. Growing Season Average Leaf Area Index*

An input to the ASRL model is the growing season average Leaf Area Index (LAI). This was derived from a refined version of the standard Moderate Resolution Imaging Spectroradiometer (MODIS) LAI product [2]. As documented in Yuan *et al.* [3], the standard MODIS LAI product was post-processed using a two-step integrated approach: (a) a modified version of a temporal spatial filter (TSF) was applied [4,5] that replaced lower quality data to an equivalent best case scenario (gap filled data) based on quality control (QC) layers and (b) the final post-processing of the LAI product was performed using the TIMESAT Savitzky-Golay (SG) filter [6]. The 8-day composites of the post-processed MODIS LAI product from 2003 to 2008 (June to September; approximate growing season) were used to evaluate growing season average LAI data based on Equation (S2):

|  | (S2) |
| --- | --- |

Here *gs_avg*. is the approximate growing season average LAI (June to September months from years 2003 to 2006), *8-day, i, j* is the 8-day LAI product for *i*th week (*m* = 16) of *j*thyear (n = 4).

**S2. Figures S1–S5**

**Figure S1.** Distribution of GLAS heights over the continental USA. We applied a Gaussian decomposition approach of Lee *et al.* [7] using the signal begin range increment (*SigBegOff*) and the last peak of Gaussians (*gpCntRntOff* 1). The potential bias due to topographic conditions has been rectified [7]. This GLAS height metric is well correlated to field-measured and airborne lidar-derived tree heights [8]. Each raster (size 1 km) is not visible at a continental scale. So, we implemented point symbols corresponding to each pixel for better presenting of GLAS-derived tree heights in this figure.

| 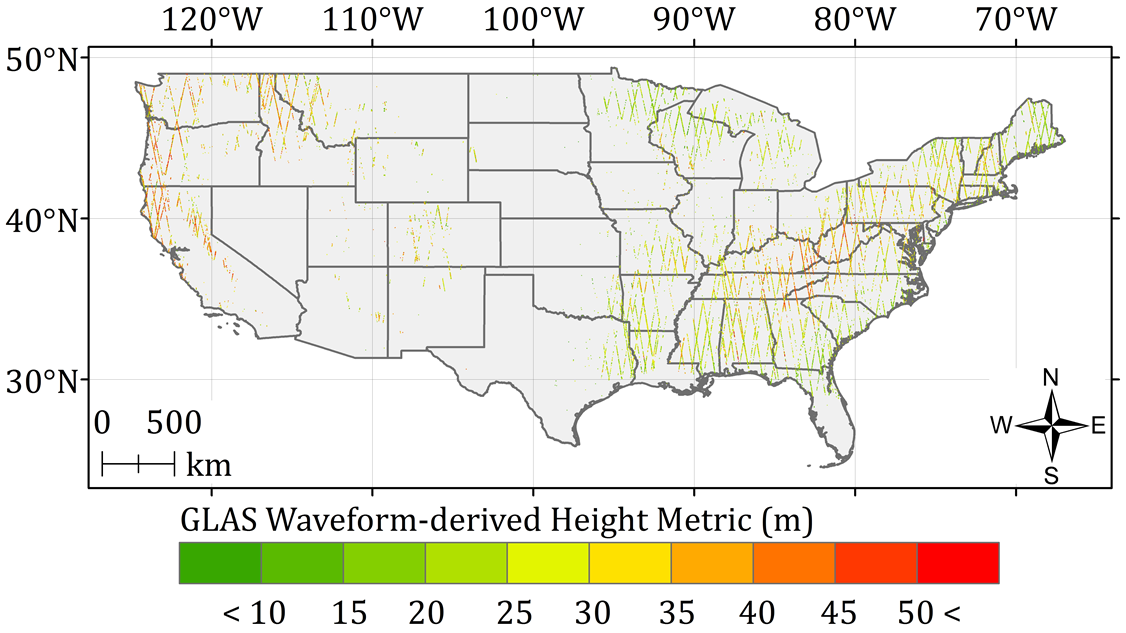 |
| --- |

**Figure S2.** Distribution of climatic zones over the empirical orthogonal panel of annual total precipitation and annual average temperature Climatic zones were defined based on three forest types (deciduous, evergreen and mixed forests) and fixed intervals of precipitation (30 mm) and temperature (2 °C) over the continental USA. The study area was thus confined to 841 climatic zones.


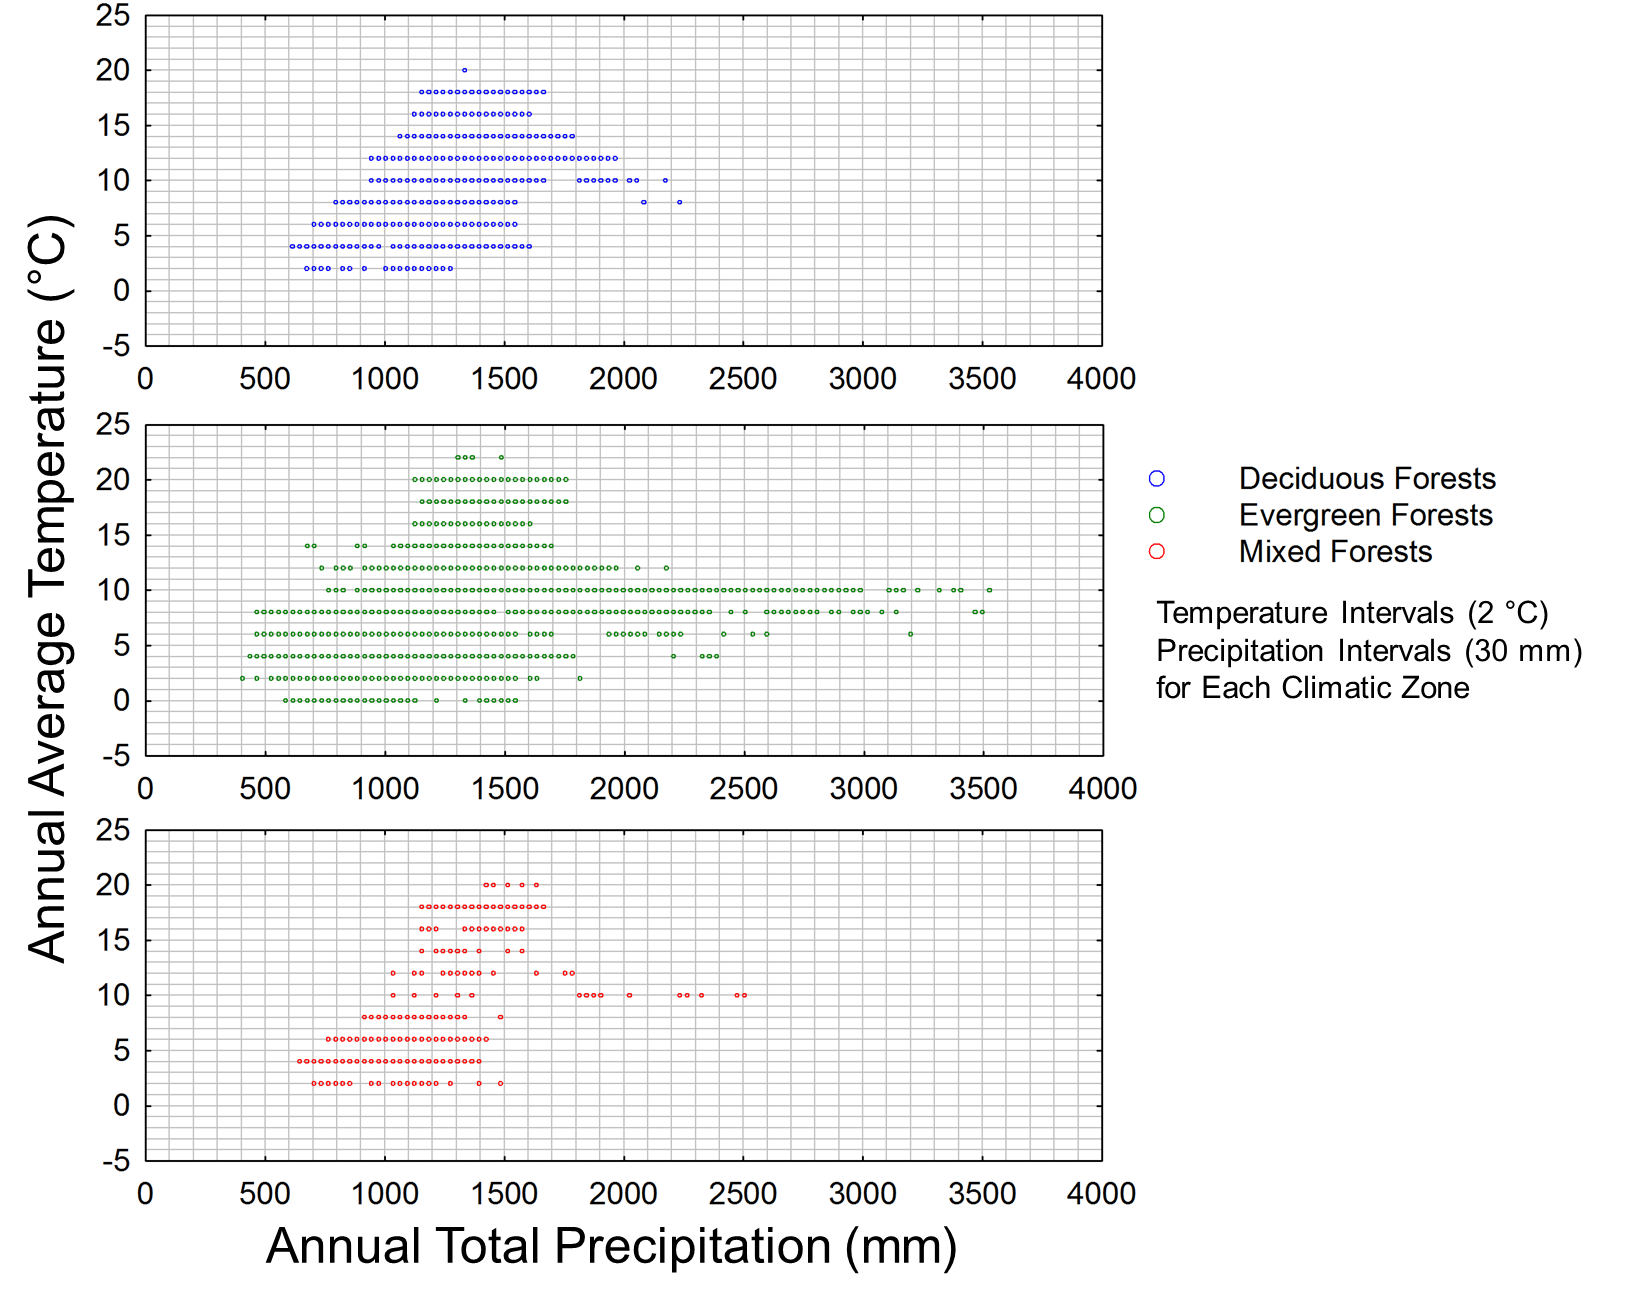


**Figure S3.** Spatial distribution of ASRL model prediction errors at pixel level. (**a**) Without optimization (*Hpotential ASRL* − *HGLAS*). (**b**) After optimization (*Hopt ASRL* − *HGLAS*). See Figure S4 for corresponding histograms.


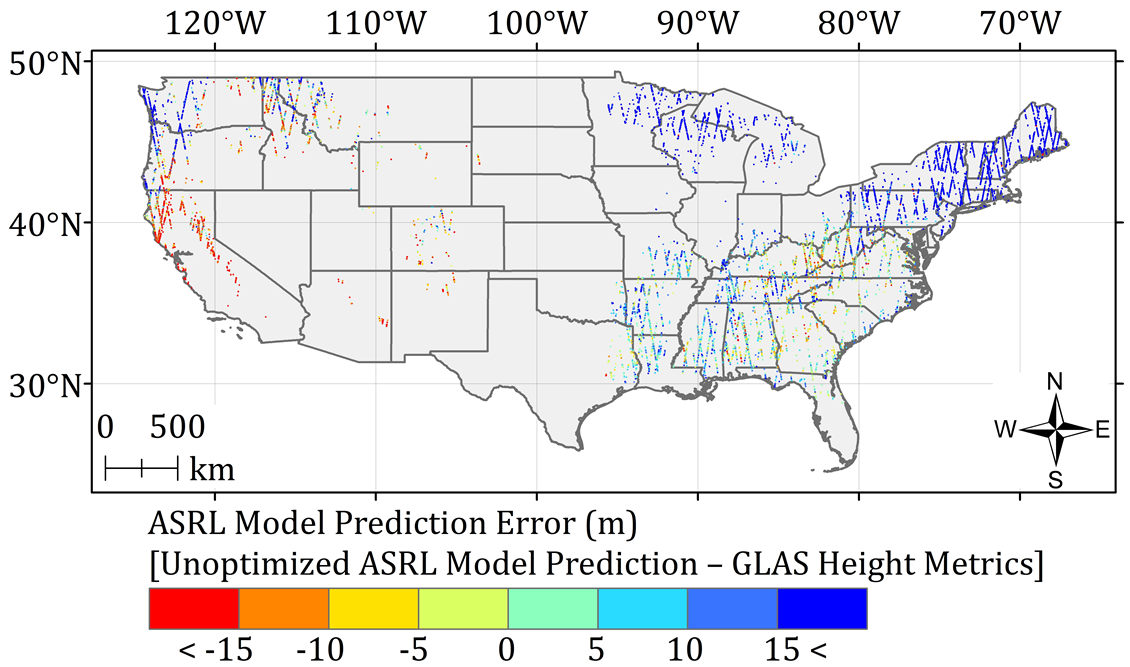


(**a**)


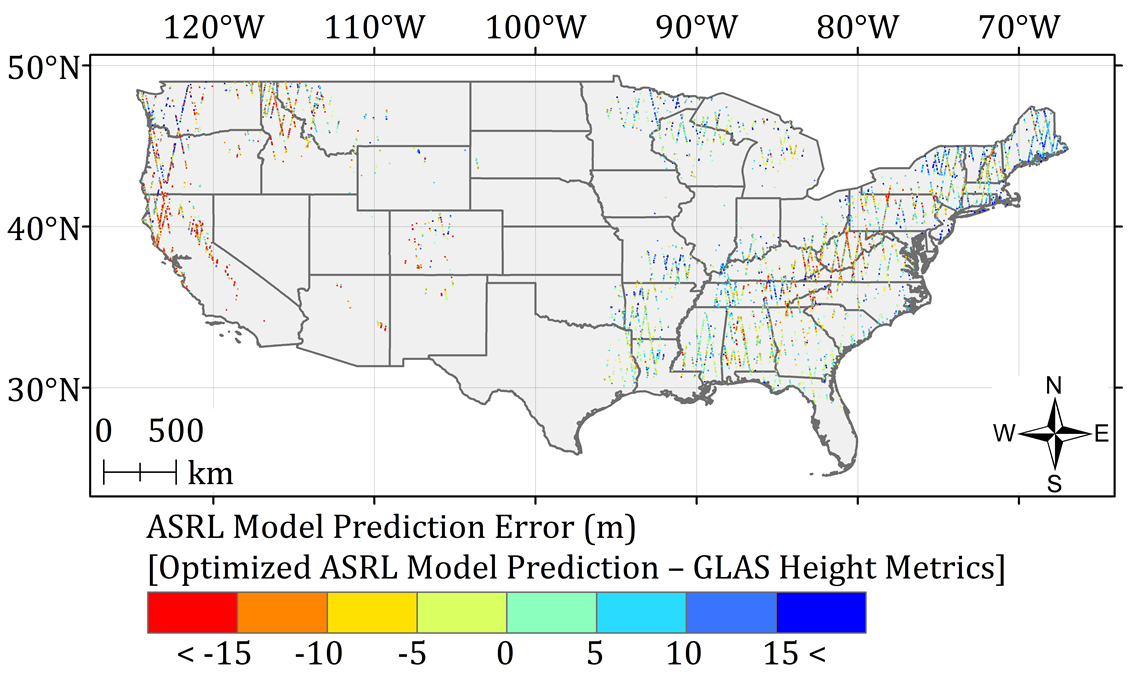


(**b**)

**Figure S4.** Histograms of ASRL model prediction errors at pixel level. (**a**) Without optimization (*Hpotential ASRL* – *HGLAS*). (**b**) After optimization (*Hopt ASRL* – *HGLAS*).

| 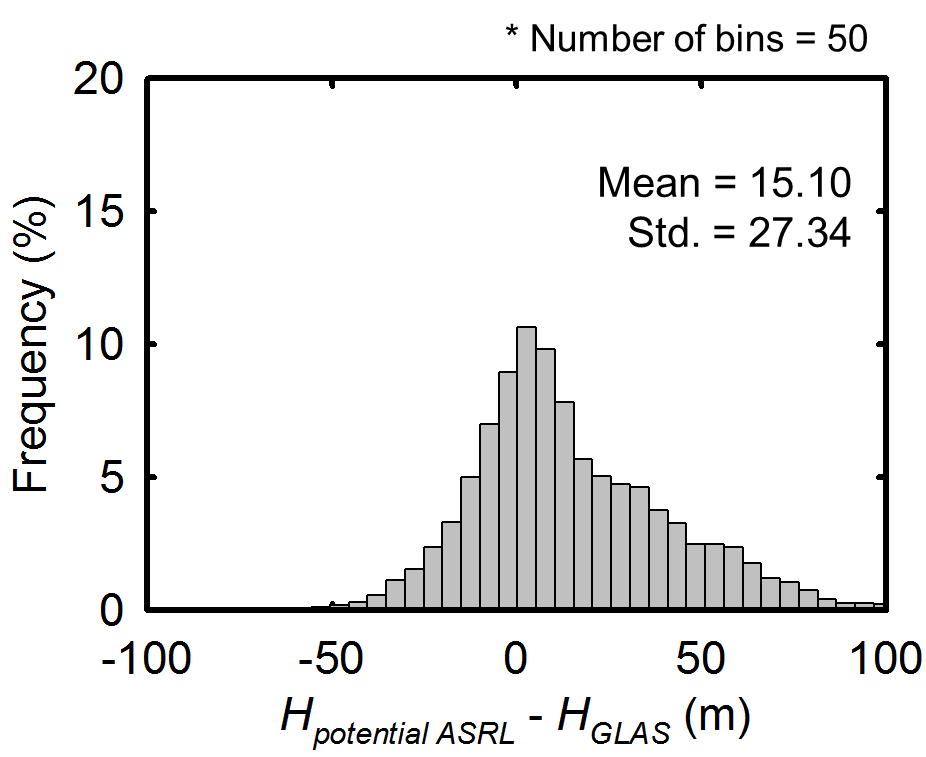 | 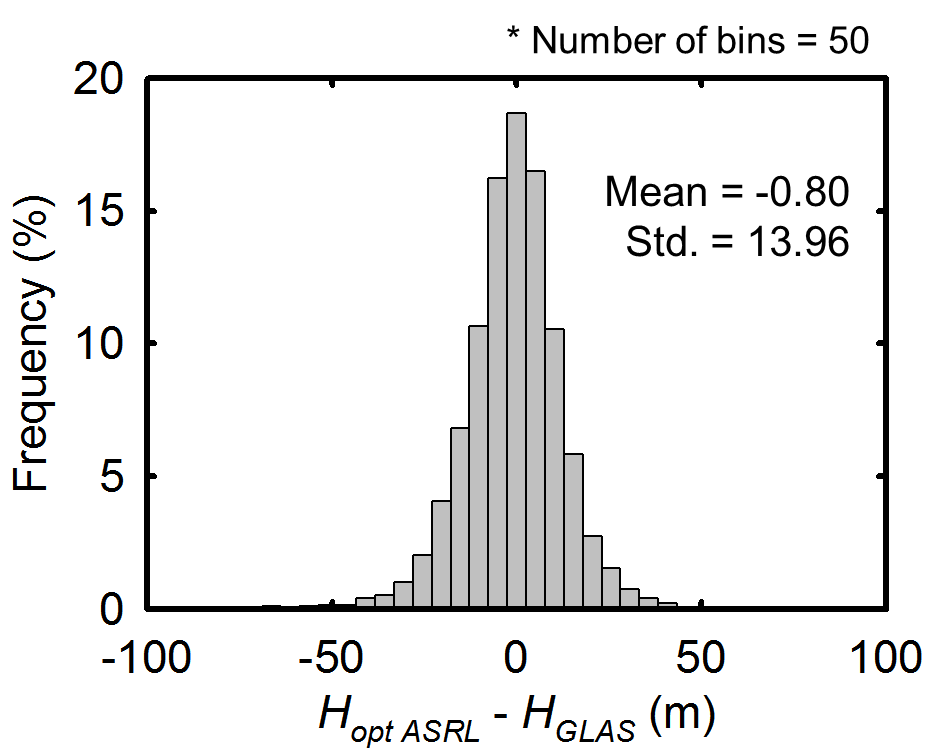 |
| --- | --- |
| (**a**) | (**b**) |

**Figure S5.** Number of valid GLAS data in each of the climatic zones considered in this study. Valid GLAS data density is relatively lower in the Northeastern Appalachian and Pacific Northwestern forest corridors.


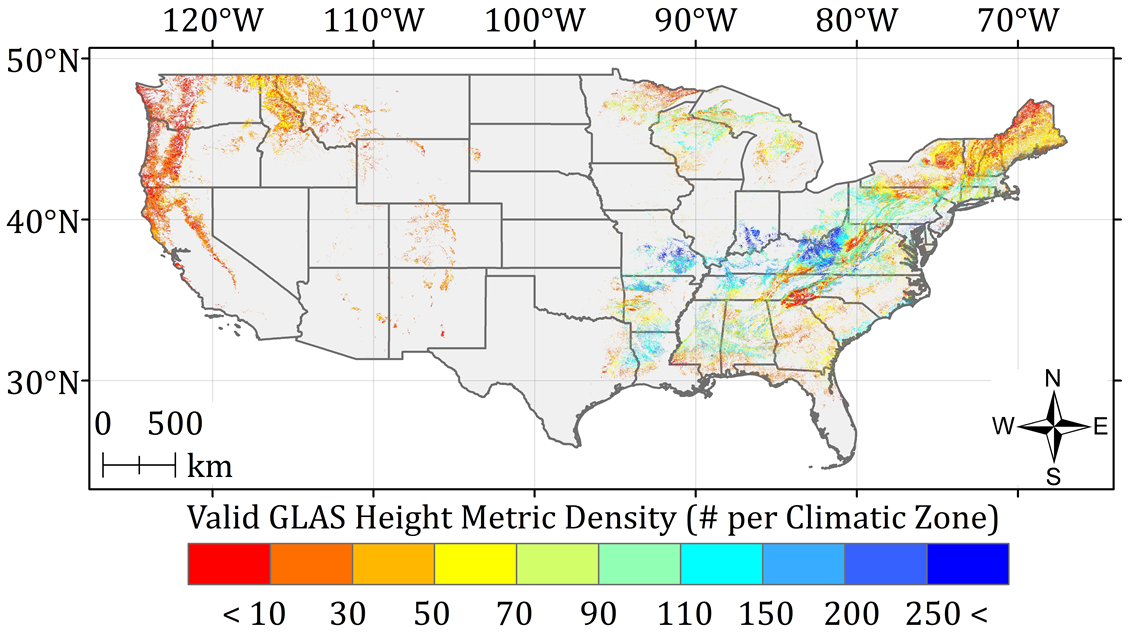


# References

1. World Meteorological Organization (WMO). *Guide to Meteorological Instruments and Methods of Observation, Appendix 4B, WMO-No. 8 (CIMO Guide)*; WMO: Geneva, Switzerland, 2008.

2. Land-Atmosphere Interaction Research Group at Beijing Normal University (BNU). LAI Data Sets for Land Surface and Climate Modeling. Available online: http://globalchange.bnu.edu.cn/
research/lai/ (accessed on 12 July 2012).

3. Yuan, H.; Dai, Y.J.; Xiao, Z.Q.; Ji, D.Y.; Wei, S.G. Reprocessing the MODIS Leaf Area Index products for land surface and climate modelling. *Remote Sens. Environ.* **2011**, *115*, 1171–1187.

4. Fang, H.L.; Liang, S.L.; Kim, H.Y.; Townshend, J.R.; Schaaf, C.L.; Strahler, A.H.; Dickinson, R.E. Developing a spatially continuous 1 km surface albedo data set over North America from Terra MODIS products. *J. Geophys. Res.-Atmos.* **2007**, *112*, doi: 10.1029/2006JD008377.

5. Fang, H.L.; Liang, S.L.; Townshend, J.R.; Dickinson, R.E. Spatially and temporally continuous LAI data sets based on an integrated filtering method: Examples from North America. *Remote Sens. Environ.* **2008**, *112*, 75–93.

6. Jonsson, P.; Eklundh, L. TIMESAT—A program for analyzing time-series of satellite sensor data. *Comput. Geosci-UK.* **2004**, *30*, 833–845.

7. Lee, S.; Ni-Meister, W.; Yang, W.Z.; Chen, Q. Physically based vertical vegetation structure retrieval from ICESat data: Validation using LVIS in White Mountain National Forest, New Hampshire, USA. *Remote Sens. Environ.* **2011**, *115*, 2776–2785.

8. Choi, S.; Ni, S.; Shi, Y.; Ganguly, S.; Zhang, G.; Duong, H.V.; Lefsky, M.A.; Simard, M.; Saatchi, S.S.; Lee, S.; *et al*. Allometric scaling and resource limitations model of tree heights: Part 2. Site based testing of the model. *Remote Sens.* **2013**, *5*, 202–223.

© 2013 by the authors; licensee MDPI, Basel, Switzerland. This article is an open access article distributed under the terms and conditions of the Creative Commons Attribution license (http://creativecommons.org/licenses/by/3.0/).
